# Supplementary material for: Superlattice-stabilized structure and charge transfer assisted photoluminescence enhancement in a samarium-doped high entropy perovskite oxide
Source: Royal Society of Chemistry journal article supplement (doi:10.1039/d3tc00958k), 2023-01-01
Supplement: d3tc00958k1.pdf [file d3tc00958k1.pdf]

## Supplementary Information

# Superlattice-stabilized structure and charge transfer assisted photoluminescence enhancement in a samarium-doped high entropy perovskite oxide

*Lei Xia<sup>a</sup>, Zhan Mao<sup>a</sup>, Xin Wang<sup>a</sup>, Jing Zhu<sup>a</sup>, Jiyang Xie<sup>a,b</sup>, Zhe Wang<sup>c</sup>, Wanbiao Hu<sup>a,b\*</sup>*

<sup>a</sup>Key Laboratory of LCR Materials and Devices of Yunnan Province, National Center for International Research on Photoelectric and Energy Materials, School of Materials and Energy, Yunnan University, Kunming 650091, P. R. China

<sup>b</sup>Electron Microscopy Center, Yunnan University, Kunming 650091, P. R. China

<sup>c</sup> College of Chemistry and Material Science, Hebei Normal University, Shijiazhuang 050024, P. R. China

**Table S.1** Crystal structural parameters from Rietveld powder XRD refinement for  $\text{Ca}_{0.98}\text{Sm}_{0.02}(\text{M}_5)\text{O}_3$  and  $\text{Ca}_{0.98}\text{Sm}_{0.02}\text{SnO}_3$ .

|                        | $\text{Ca}_{0.98}\text{Sm}_{0.02}(\text{M}_5)\text{O}_3$ | $\text{Ca}_{0.98}\text{Sm}_{0.02}\text{SnO}_3$ |
|------------------------|----------------------------------------------------------|------------------------------------------------|
| Lattice parameters (Å) |                                                          |                                                |
| a                      | 5.5140                                                   | 5.5318                                         |
| b                      | 7.8816                                                   | 7.9061                                         |
| c                      | 5.6634                                                   | 5.6801                                         |
| Bond length (Å)        |                                                          |                                                |
| B-O <sub>1</sub>       | 2.000                                                    | 2.055                                          |
| B-O <sub>21</sub>      | 2.014                                                    | 2.057                                          |
| B-O <sub>22</sub>      | 2.071                                                    | 2.056                                          |
| B-O <sub>23</sub>      | 2.014                                                    | 2.057                                          |
| B-O <sub>24</sub>      | 2.071                                                    | 2.056                                          |
| Bond angle (°)         |                                                          |                                                |
| O1-B-O21               | 86.5565                                                  | 89.9905                                        |
| O1-B-O22               | 93.4435                                                  | 90.0095                                        |
| O1-B-O23               | 91.3169                                                  | 88.3347                                        |
| O1-B-O24               | 88.6804                                                  | 91.6653                                        |

**Table S.2** The Raman bands position of Sm<sup>3+</sup>-doped phosphor samples.

|                          | Ca(M <sub>5</sub> )O <sub>3</sub> | CaSnO <sub>3</sub> [1] | CaZrO <sub>3</sub> [2] | CaHfO <sub>3</sub> | CaTiO <sub>3</sub> [3] |     |
|--------------------------|-----------------------------------|------------------------|------------------------|--------------------|------------------------|-----|
| O-B-O bending modes      | 189                               | 167                    | 147                    | 151                | 159                    |     |
|                          |                                   | 187                    | 191                    |                    | 184                    |     |
|                          | 235                               |                        | 216                    | 214                | 228                    |     |
|                          |                                   |                        |                        | 233                |                        |     |
|                          | 258                               |                        | 265                    | 265                | 250                    |     |
|                          | 286                               | 282                    | 289                    | 293                | 290                    |     |
|                          | 353                               | 361                    | 360                    | 362                | 340                    |     |
|                          |                                   |                        | 389                    |                    |                        |     |
|                          | B-O <sub>3</sub> torsional modes  | 452                    | 447                    | 441                | 450                    |     |
|                          |                                   | 480                    |                        | 472                | 480                    | 473 |
|                          |                                   |                        |                        |                    | 498                    |     |
| B-O symmetric stretching | 525                               |                        | 549                    | 588                | 634                    |     |

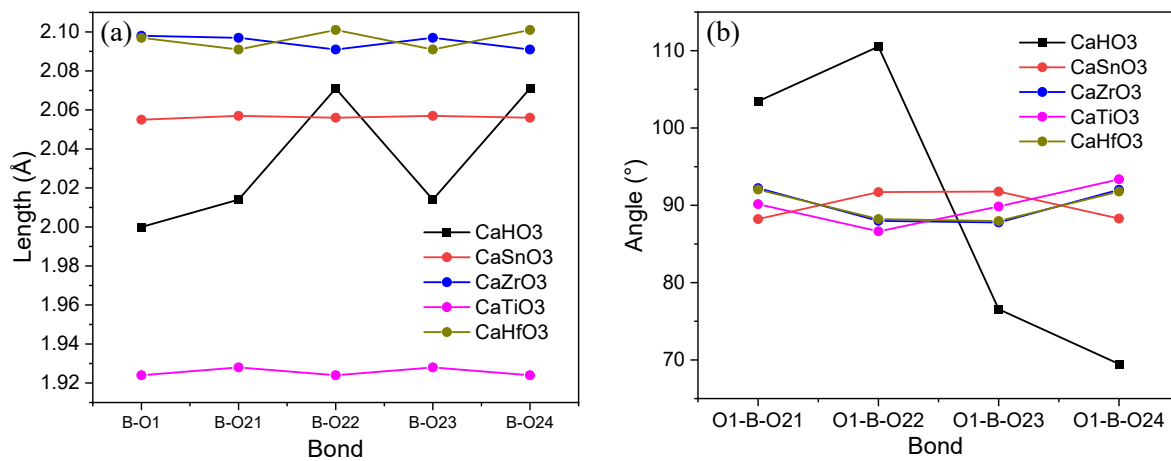

**Figure S1.** Bond length (a) and angle (b) fluctuations for all the compositions.

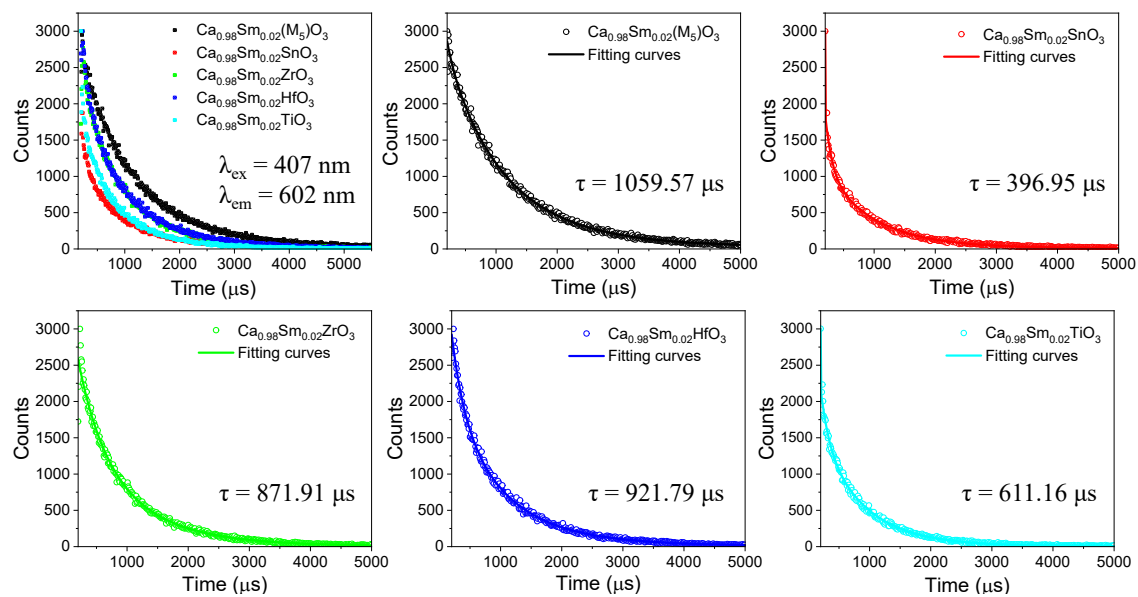

**Figure S2.** The PL lifetime curve and after fitting of  $\text{Sm}^{3+}$ -doped phosphor samples under 407 nm excitation.

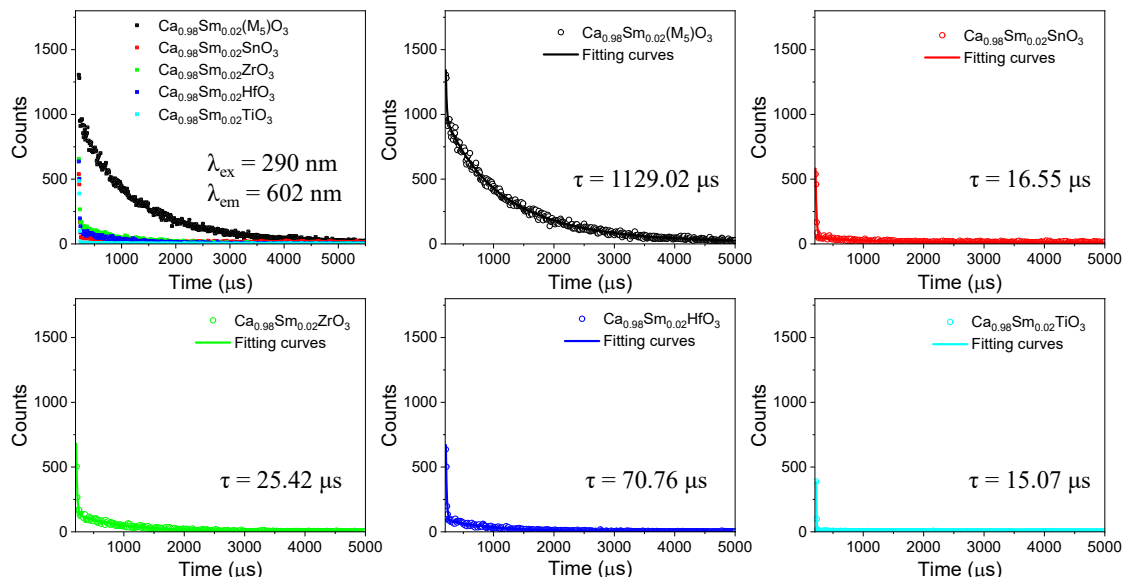

**Figure S3.** The PL lifetime curve and after fitting of  $\text{Sm}^{3+}$ -doped phosphor samples under 290 nm excitation.

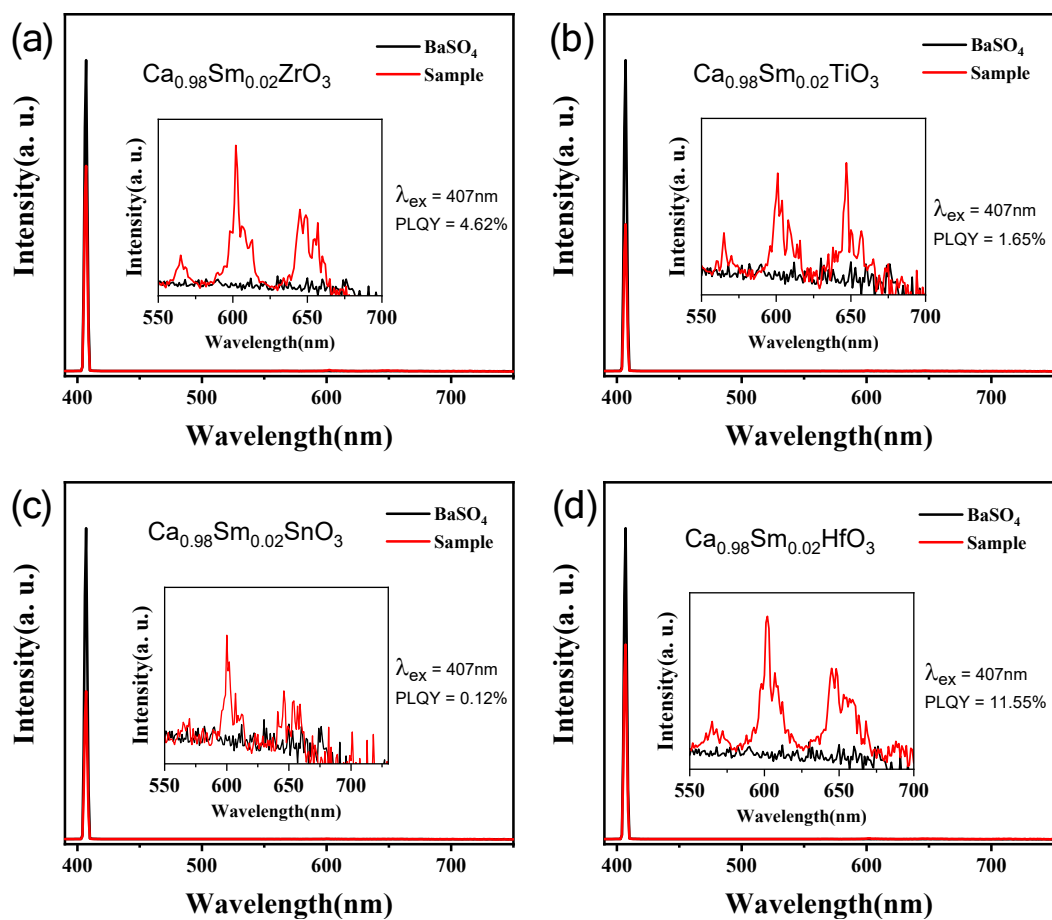

**Figure S4.** The PLQY measurement of Ca<sub>0.98</sub>Sm<sub>0.02</sub>ZrO<sub>3</sub> (a), Ca<sub>0.98</sub>Sm<sub>0.02</sub>TiO<sub>3</sub> (b), Ca<sub>0.98</sub>Sm<sub>0.02</sub>SnO<sub>3</sub> (c) and Ca<sub>0.98</sub>Sm<sub>0.02</sub>NbO<sub>3</sub> (d) phosphor.

## Decay lifetime

The optical decay time is fitted via the third-order exponential function with the following equation [4]:

$$I(t) = I_0 + A_1 \exp(-t/\tau_1) + A_2 \exp(-t/\tau_2) + A_3 \exp(-t/\tau_3) \quad (S1)$$

Where  $t$  represents the time,  $I(t)$  is the emission intensity corresponding to time  $t$ ,  $I_0$  is the initial emission intensity corresponding to time  $t = 0$ ,  $A_1$ ,  $A_2$  and  $A_3$  are constants,  $\tau_1$ ,  $\tau_2$  and  $\tau_3$  are lifetimes for the exponential components. The average lifetime  $\tau$  can be obtained by the formula as follows:

$$\tau = (A_1\tau_1^2 + A_2\tau_2^2 + A_3\tau_3^2) / (A_1\tau_1 + A_2\tau_2 + A_3\tau_3) \quad (S2)$$

## Color coordinates

The quality of the color produced by  $\text{Sm}^{3+}$ -doped  $\text{Ca}(\text{M}_5)\text{O}_3$  is evaluated by calculating chromaticity Commission International de l'Eclairage (CIE1931) coordinates. The calculations are based on the evaluation of three CIE coordinates  $x$ ,  $y$  and  $z$  defined by the equation [5]:

$$\begin{cases} x = X/(X + Y + Z) \\ y = Y/(X + Y + Z) \\ z = Z/(X + Y + Z) \end{cases} \quad (S3)$$

Where  $x + y + z = 1$ , and depends upon the tristimulus values,  $X$ ,  $Y$  and  $Z$ . However, to specify the chromaticity of a sample, two independent variables  $x$  and  $y$ , are generally used. The values for  $X$ ,  $Y$  and  $Z$  are proportional to the spectral intensity of the material,  $I(\lambda)$ , and chromatic functions of the observer,  $\bar{x}$ ,  $\bar{y}$  and  $\bar{z}$  as the following equation:

$$\begin{cases} X = \int_{450nm}^{750nm} I(\lambda) \cdot \bar{x}(\lambda) d\lambda \\ Y = \int_{450nm}^{750nm} I(\lambda) \cdot \bar{y}(\lambda) d\lambda \\ Z = \int_{450nm}^{750nm} I(\lambda) \cdot \bar{z}(\lambda) d\lambda \end{cases} \quad (S4)$$

## Correlated color temperature (CCT)

The parameter of CCT can be speculated using McCamy empirical formula, which is illustrated as [6]:

$$CCT = -449n^3 + 3525n^2 + 6823.3n + 5520.33 \quad (S5)$$

Where  $n = (x - 0.3320)/(y - 0.1858)$ .



### **Color purity [7]**

The parameter of color purity [7] can be obtained via the follow equation [8]:

$$CP = \sqrt{(x - x_i)^2 + (y - y_i)^2} / \sqrt{(x_d - x_i)^2 + (y_d - y_i)^2} \quad (S6)$$

Where  $(x_i, y_i)$  is the illuminant point (0.3101, 0.3162), which corresponds to the CIE1931 Standard Source C. The color coordinates  $(x_d, y_d)$  come from the domain emission.

### **PL quantum efficiency**

PL quantum efficiency (PLQY) can be calculated according to the formula as follows [5]:

$$PLQY = \int L_S / \left( \int E_R - \int E_S \right) \quad (S7)$$

Where  $L_S$  is the emission spectrum of the sample,  $E_R$  and  $E_S$  stand for the excitation spectra without and with the sample in the integrating sphere, respectively.

### **Thermal quenching mechanism**

To investigate the thermal quenching mechanism of the  $\text{Sm}^{3+}$ -doped  $\text{Ca}(\text{M}_5)\text{O}_3$  sample, the activation energy [3] was calculated via the following Arrhenius equation [9]:

$$\ln[(I_0/I(T))-1] = \ln A - (E_a/kT) \quad (S8)$$

Where  $I_0$  is the initial emission intensity of the phosphor at room temperature,  $I(T)$  is the emission intensity at testing temperature  $T$ ,  $A$  is an invariable constant for a certain host, and  $k$  represent the Boltzmann constant ( $8.629 * 10^{-5}$  eV/K). on the basis of the equation, the relationship between  $\ln[(I_0/I(T))-1]$  versus  $1/kT$  is shown.

## References

- [1] M. Tarrida, H. Larguem, M. Madon, Structural investigations of (Ca,Sr)ZrO<sub>3</sub> and Ca(Sn,Zr)O<sub>3</sub> perovskite compounds, *Phys. Chem. Miner.* 36(7) (2009) 403-413.
- [2] Z. He, X.-Y. Sun, X. Gu, Enhancements of luminescent properties of CaZrO<sub>3</sub>: Eu<sup>3+</sup> by A<sup>+</sup> (A = Li, Na, K), *Chem. Phys.* 513 (2018) 94-98.
- [3] H. Zheng, I. Reaney, G. de Gyorgyfalva, R. Ubic, J. Yarwood, M. Seabra, V. Ferrira, Raman spectroscopy of CaTiO<sub>3</sub>-based perovskite solid solutions, *J. Mater. Res.* 19(2) (2004) 488-495.
- [4] G. Zhu, Z.W. Li, F.G. Zhou, M. Gao, C. Wang, S. Xin, Novel layered niobate phosphors SrBaNb<sub>4</sub>O<sub>12</sub>: Re<sup>3+</sup> (Re= Eu, Dy, Sm and Pr): Crystal structure, electronic structure and luminescence property investigation, *J. Lumin.* 211 (2019) 76-81.
- [5] Z.Y. Fang, D. Yang, Y.K. Zheng, J. Song, T. Yang, R. Song, Y. Xiang, J. Zhu, NUV-pumped luminescence of thermally stable samarium-activated alkali metal borophosphate phosphor, *J. Adv. Cream.* 10(5) (2021) 1072-1081.
- [6] C. Mccamy, Correlated Color Temperature as an Explicit Function of Chromaticity Coordinates, *Color Res. Appl.* 17(2) (1992) 142-144.
- [7] M. Gazda, T. Miruszewski, D. Jaworski, A. Mielewczyk-Gryn, W. Skubida, S. Wachowski, P. Winiarz, K. Dzierzgowski, M. Lapinski, I. Szpunar, E. Dzil, Novel Class of Proton Conducting Materials - High Entropy Oxides, *ACS Mater. Lett.* 2(10) (2020) 1315-1321.
- [8] L. Xia, J.Y. Xie, W.B. Hu, Locally-ordered A-site vacancy assisted photoluminescence enhancement in simply rare-earth doped perovskite oxide, *Mater. Adv.* 3(23) (2022) 8608-8615.
- [9] T. Hu, L. Xia, W. Liu, J. Xie, Z. Jiang, F. Xiong, W. Hu, Dy<sup>3+</sup> doped LaInO<sub>3</sub>: a host sensitized white luminescence phosphor with exciton mediated energy transfer, *J. Mater. Chem. C* 9(38) (2021) 13410-13419.
